# Supplementary material for: Copper(ii) coordination polymers: tunable structures and a different activation effect of hydrogen peroxide for the degradation of methyl orange under visible light irradiation
Source: Royal Society of Chemistry journal article supplement (doi:10.1039/c4dt02440k), 2014-11-10
Supplement: c4dt02440k1.pdf [file c4dt02440k1.pdf]

*Supporting Information for the Manuscript:*

**Copper(II) Coordination Polymers: Tunable Structures and Different Activation Effect of Hydrogen Peroxide for the Degradation of Methyl Orange under Visible Light Irradiation**

**Lu Liu,<sup>a</sup> Dongqing Wu,<sup>a,b</sup> Bei Zhao,<sup>a</sup> Xiao Han,<sup>a</sup> Jie Wu,<sup>\*a</sup> Hongwei Hou<sup>\*a</sup> and Yaoting Fan<sup>a</sup>**

<sup>a</sup>The College of Chemistry and Molecular Engineering, Zhengzhou University, Zhengzhou 450052, P. R. China

<sup>b</sup>State Key Laboratory of Coordination Chemistry, School of Chemistry and Chemical Engineering, Nanjing University, Nanjing 210093, China

Author for correspondence: Prof. Hongwei Hou, E-mail: [houghw@zzu.edu.cn](mailto:houghw@zzu.edu.cn)

**Table S1.** Crystal data and structure refinement details for polymers **1**, **2** and **3**.

| Complex                                                                | <b>1</b>                                                          | <b>2</b>                                                                          | <b>3</b>                                                          |
|------------------------------------------------------------------------|-------------------------------------------------------------------|-----------------------------------------------------------------------------------|-------------------------------------------------------------------|
| Formula                                                                | C <sub>32</sub> H <sub>42</sub> N <sub>14</sub> O <sub>7</sub> Cu | C <sub>32</sub> H <sub>50</sub> N <sub>12</sub> O <sub>5</sub> Cl <sub>2</sub> Cu | C <sub>16</sub> H <sub>20</sub> N <sub>6</sub> Cl <sub>2</sub> Cu |
| Fw                                                                     | 798.34                                                            | 817.28                                                                            | 430.82                                                            |
| Temp(K)                                                                | 293(2)                                                            | 293(2)                                                                            | 293(2)                                                            |
| Wavelength(Å)                                                          | 0.71073                                                           | 0.71073                                                                           | 0.71073                                                           |
| Crystal system                                                         | Orthorhombic                                                      | Triclinic                                                                         | Monoclinic                                                        |
| Space group                                                            | <i>Ibam</i>                                                       | <i>P-1</i>                                                                        | <i>P2(1)/c</i>                                                    |
| <i>a</i> (Å)                                                           | 23.711(5)                                                         | 7.9002(16)                                                                        | 13.329(3)                                                         |
| <i>b</i> (Å)                                                           | 8.9025(18)                                                        | 10.020(2)                                                                         | 14.147(3)                                                         |
| <i>c</i> (Å)                                                           | 33.427(7)                                                         | 13.153(3)                                                                         | 9.6681(19)                                                        |
| $\alpha$ (deg)                                                         | 90                                                                | 101.72(3)                                                                         | 90                                                                |
| $\beta$ (deg)                                                          | 90                                                                | 93.69(3)                                                                          | 101.46(3)                                                         |
| $\gamma$ (deg)                                                         | 90                                                                | 91.54(3)                                                                          | 90                                                                |
| <i>V</i> (Å <sup>3</sup> )                                             | 7056(3)                                                           | 1016.5(4)                                                                         | 1786.7(6)                                                         |
| <i>Z</i>                                                               | 8                                                                 | 1                                                                                 | 4                                                                 |
| <i>D<sub>c</sub></i> (g·cm <sup>-3</sup> )                             | 1.503                                                             | 1.335                                                                             | 1.602                                                             |
| $\mu$ (mm <sup>-1</sup> )                                              | 0.689                                                             | 0.721                                                                             | 1.534                                                             |
| F(000)                                                                 | 3336                                                              | 429                                                                               | 884                                                               |
| GOF on F <sup>2</sup>                                                  | 1.070                                                             | 1.055                                                                             | 1.011                                                             |
| <i>R<sub>I</sub></i> [ <i>I</i> >2 $\sigma$ ( <i>I</i> )] <sup>a</sup> | 0.0741                                                            | 0.0664                                                                            | 0.0772                                                            |
| <i>wR<sub>2</sub></i> (all data) <sup>b</sup>                          | 0.1620                                                            | 0.1679                                                                            | 0.1502                                                            |

$$^a R_1 = [|\sum |F_o| - |\sum |F_c||] / \sum |F_o| \quad ^b wR_2 = [w(F_o^2 - F_c^2)^2] / [w(F_o^2)^2]^{1/2}$$

**Table S2. Selected bond lengths / Å and angles /° for 1 and 2<sup>a</sup>.**

| Complex 1           |            |                    |            |                     |            |
|---------------------|------------|--------------------|------------|---------------------|------------|
| Cu(1)-N(4)          | 2.047(4)   | Cu(1)-O(1)         | 2.249(5)   | Cu(1)-N(4)#1        | 2.047(4)   |
| Cu(1)-N(1)          | 2.032(3)   | Cu(1)-N(1)#1       | 2.032(3)   | N(1)#1-Cu(1)-N(1)   | 173.3(2)   |
| N(4)#1-Cu(1)-N(1)   | 91.05(14)  | N(4)-Cu(1)-O(1)    | 103.49(11) | N(4)-Cu(1)-N(1)     | 90.51(14)  |
| N(4)#1-Cu(1)-O(1)   | 103.50(11) | N(4)-Cu(1)-N(4)#1  | 153.0(2)   | N(1)#1-Cu(1)-O(1)   | 86.67(10)  |
| N(4)-Cu(1)-N(1)#1   | 91.05(14)  | N(1)-Cu(1)-O(1)    | 86.67(10)  | N(4)#1-Cu(1)-N(1)#1 | 90.51(14)  |
| Complex 2           |            |                    |            |                     |            |
| Cu(1)-N(4)          | 2.021(2)   | Cu(1)-N(1)#1       | 2.009(2)   | Cu(1)-N(4)#1        | 2.021(2)   |
| Cu(1)-N(1)          | 2.009(2)   | N(4)-Cu(1)-N(1)#1  | 89.22(9)   | N(4)-Cu(1)-N(1)     | 90.78(9)   |
| N(4)#1-Cu(1)-N(1)#1 | 90.78(9)   | N(4)#1-Cu(1)-N(1)  | 89.22(9)   | N(4)-Cu(1)-N(4)#1   | 180.00(10) |
| N(1)#1-Cu(1)-N(1)   | 180.00(12) |                    |            |                     |            |
| Complex 3           |            |                    |            |                     |            |
| Cu(1)-N(6)#1        | 2.023(5)   | Cu(1)-N(3)         | 2.013(5)   | Cu(1)-Cl(1)         | 2.3207(17) |
| Cu(1)-Cl(2)         | 2.2550(18) | N(6)#1-Cu(1)-Cl(1) | 90.63(15)  | N(3)-Cu(1)-Cl(1)    | 91.37(15)  |
| N(6)#1-Cu(1)-Cl(2)  | 89.05(16)  | N(3)-Cu(1)-Cl(2)   | 89.14(15)  | N(6)-Cu(1)-N(3)     | 166.3(3)   |
| Cl(1)-Cu(1)-Cl(2)   | 179.09(7)  |                    |            |                     |            |

<sup>a</sup> Symmetry transformations used to generate equivalent atoms in Complex 1: #1 1-x,1-y,z; Complex 2: #1 -x,-y+1,-z; Complex 3: #1 x+1,y,z+1.

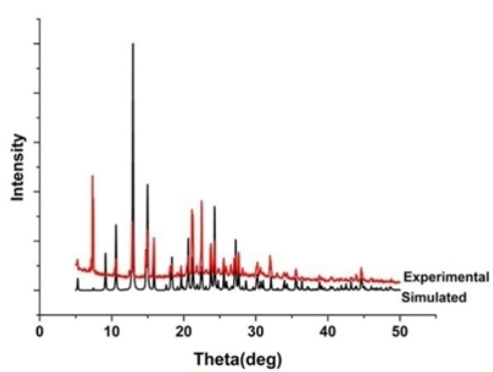

(a) Complex 1

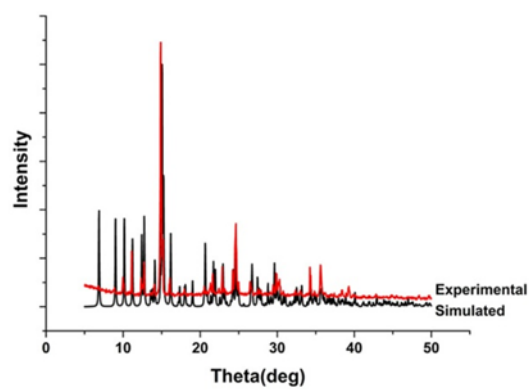

(b) Complex 2

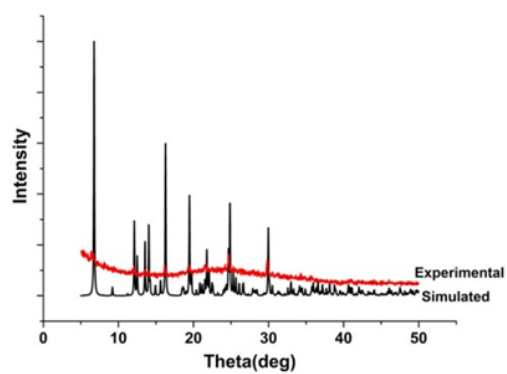

(c) Complex 3

**Fig. S1.** Experimental (red) and simulated (black) PXRD patterns of complexes.

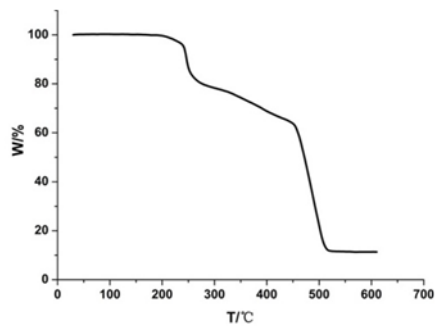

(a) Complex 1

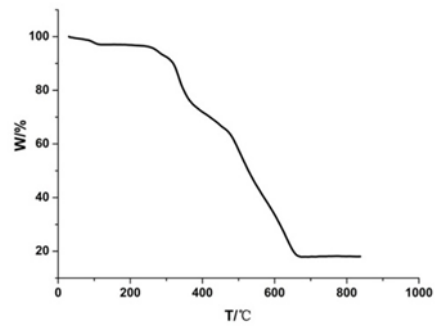

(b) Complex 2

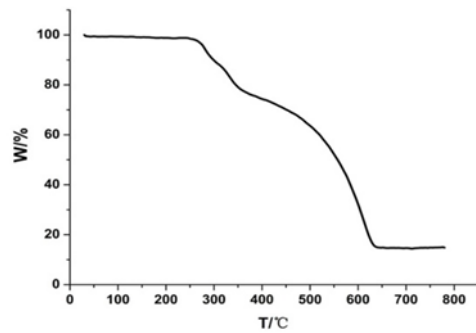

(c) Complex 3

**Fig. S2.** TGA curves of complexes 1, 2, 3.

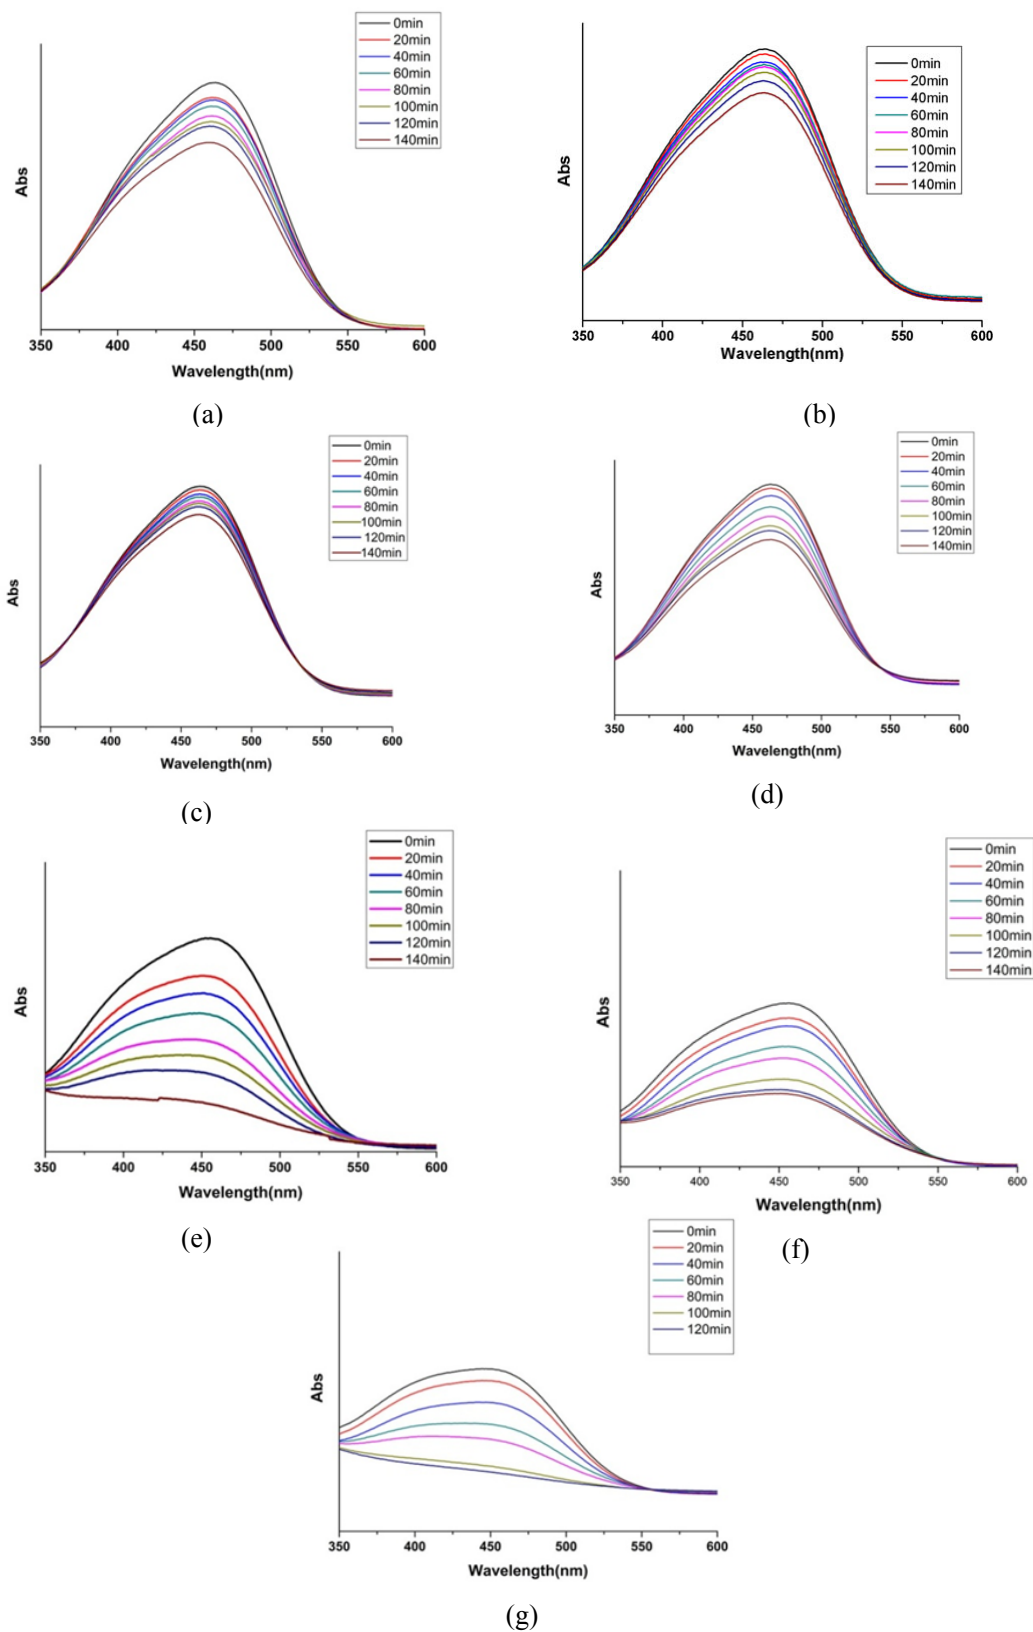

**Fig.S3.** UV-vis absorption of MO at different time intervals under Xe lamp irradiation: (a) with  $\text{H}_2\text{O}_2$ ; (b) with complex 1; (c) with complex 2; (d) with complex 3; (e) with complex 1 and  $\text{H}_2\text{O}_2$ ; (f) with complex 2 and  $\text{H}_2\text{O}_2$ ; (g) with complex 3 and  $\text{H}_2\text{O}_2$ .

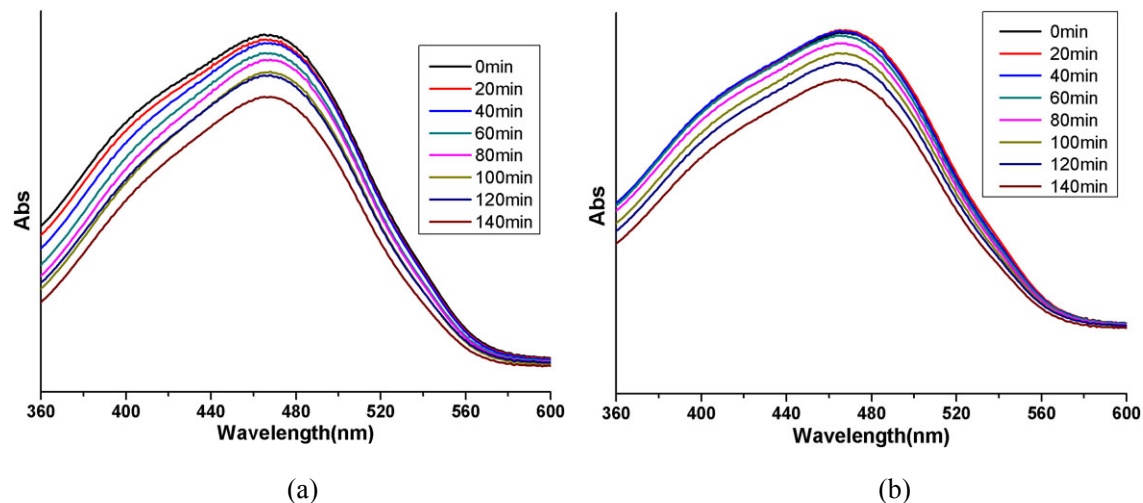

**Fig.S4.** UV-vis absorption of MO at different time intervals under Xe lamp irradiation: (a) with  $\text{Cu}(\text{NO}_3)_2$  and  $\text{H}_2\text{O}_2$ ; (b) with  $\text{CuCl}_2$  and  $\text{H}_2\text{O}_2$ .

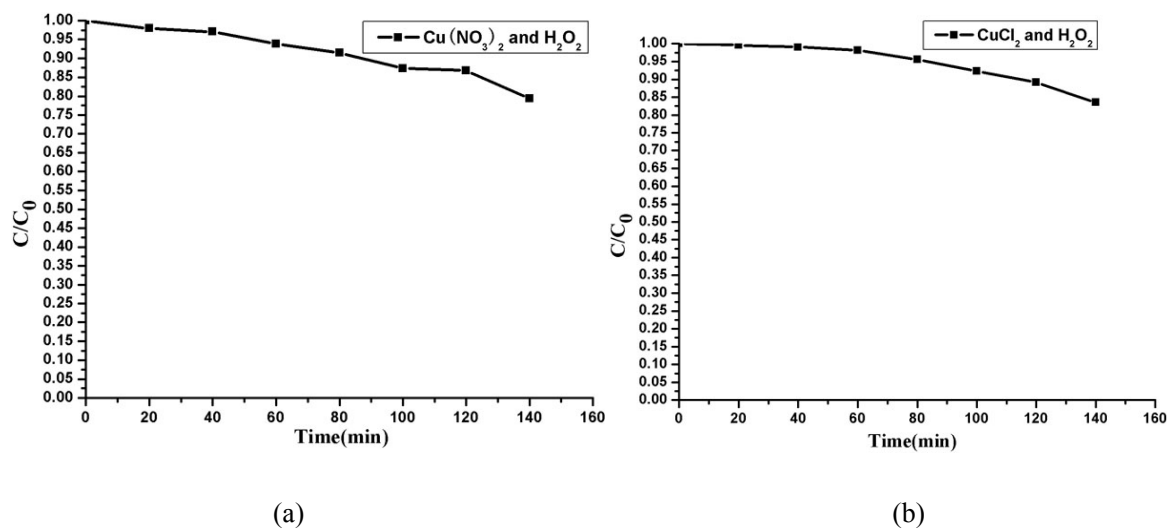

**Fig.S5.** Concentration changes of MO at different time intervals under Xe lamp irradiation: (a) For  $\text{Cu}(\text{NO}_3)_2$  and  $\text{H}_2\text{O}_2$ ; (b) For  $\text{CuCl}_2$  and  $\text{H}_2\text{O}_2$ .

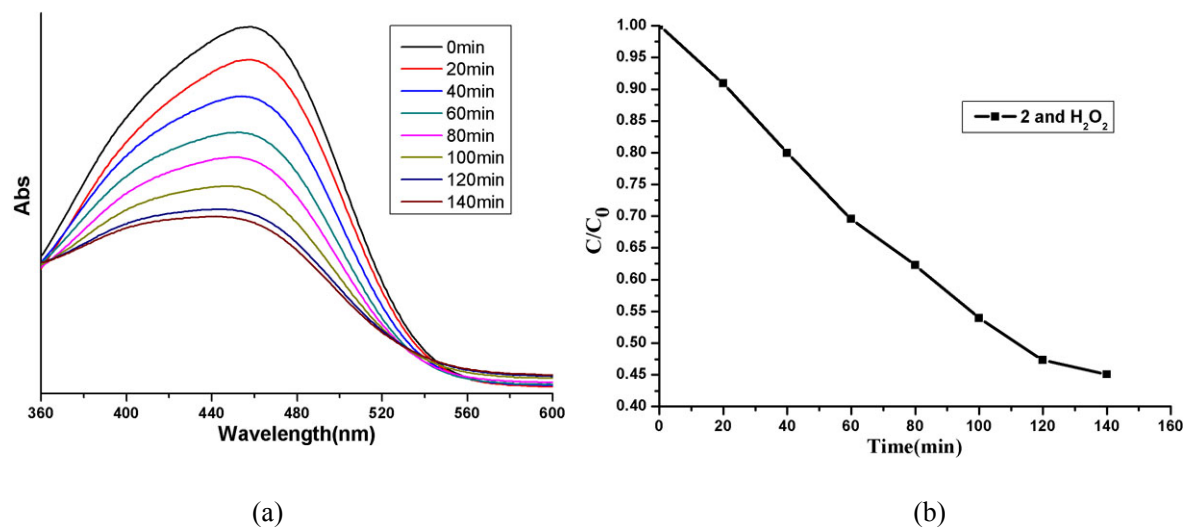

**Fig.S6.** (a) UV-vis absorption of MO at different time intervals under Xe lamp irradiation with complex **2**; (b) Concentration changes of MO at different time intervals under Xe lamp irradiation for **2** and H<sub>2</sub>O<sub>2</sub>.



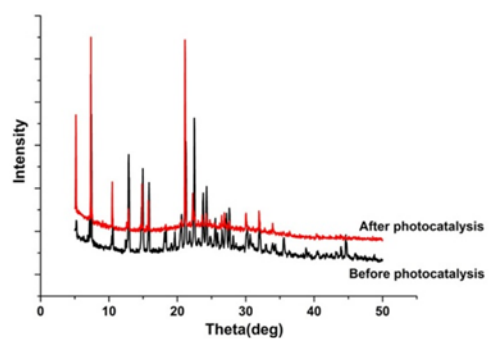

(a) Complex 1

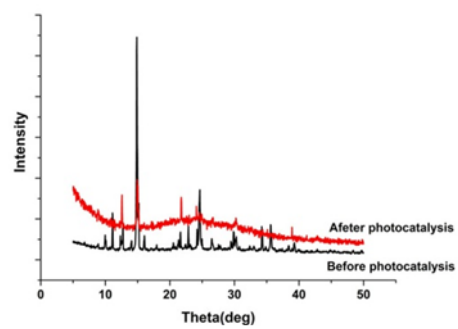

(b) Complex 2

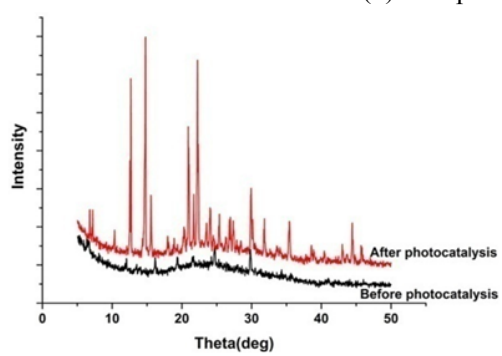

(c) Complex 3

**Fig. S7.** PXRD patterns of complexes before and after catalysis.
